# Supplementary material
Source: PubMed Central journal article supplement (PMC3755878)
Supplement: NIHMS499628-supplement-eTables.pdf [file NIHMS499628-supplement-eTables.pdf]

## Appendix

eTable 1 Community-specific seasonal mean species-to-mass ratios

| Community   |    | Al      | As      | Br      | Cr      | EC      | Fe      | K       | Mn      | Na <sup>+</sup> | NO <sub>3</sub> | Ni      | NH <sub>4</sub> <sup>+</sup> | OC      | Pb      | Si      | SO <sub>4</sub> <sup>2-</sup> | V       | Zn      |
|-------------|----|---------|---------|---------|---------|---------|---------|---------|---------|-----------------|-----------------|---------|------------------------------|---------|---------|---------|-------------------------------|---------|---------|
| Seattle     | W  | 3.8E-04 | 1.0E-04 | 1.9E-04 | 1.3E-04 | 6.9E-02 | 4.5E-03 | 4.1E-03 | 2.9E-04 | 1.3E-04         | 7.0E-02         | 1.3E-04 | 1.7E-04                      | 2.6E-01 | 3.8E-04 | 2.9E-04 | 1.3E-04                       | 1.7E-04 | 2.3E-03 |
| Seattle     | Sp | 2.5E-03 | 1.2E-04 | 2.9E-04 | 2.4E-04 | 6.7E-02 | 6.4E-03 | 5.1E-03 | 3.4E-04 | 2.4E-04         | 9.0E-02         | 2.4E-04 | 3.4E-04                      | 2.6E-01 | 5.1E-04 | 3.4E-04 | 2.4E-04                       | 3.4E-04 | 7.8E-03 |
| Seattle     | Su | 1.4E-03 | 9.5E-05 | 2.4E-04 | 2.3E-04 | 6.3E-02 | 6.9E-03 | 7.8E-03 | 4.2E-04 | 3.8E-04         | 6.9E-02         | 3.8E-04 | 6.6E-04                      | 2.9E-01 | 4.6E-04 | 4.2E-04 | 3.8E-04                       | 6.6E-04 | 5.7E-03 |
| Seattle     | F  | 3.8E-04 | 1.2E-04 | 2.2E-04 | 1.6E-04 | 6.5E-02 | 5.0E-03 | 4.6E-03 | 2.9E-04 | 2.2E-04         | 7.6E-02         | 2.2E-04 | 3.5E-04                      | 2.7E-01 | 4.2E-04 | 2.9E-04 | 2.2E-04                       | 3.5E-04 | 3.0E-03 |
| Sacramento  | W  | 1.1E-03 | 1.2E-04 | 1.6E-04 | 1.3E-04 | 8.8E-02 | 4.2E-03 | 8.9E-03 | 1.2E-04 | 6.6E-04         | 2.8E-01         | 6.6E-04 | 4.7E-05                      | 6.0E-01 | 2.6E-04 | 1.2E-04 | 6.6E-04                       | 4.7E-05 | 3.2E-03 |
| Sacramento  | Sp | 4.9E-03 | 1.6E-04 | 2.8E-04 | 1.4E-04 | 8.0E-02 | 8.8E-03 | 7.3E-03 | 2.5E-04 | 8.4E-04         | 1.9E-01         | 8.4E-04 | 8.3E-05                      | 3.8E-01 | 4.5E-04 | 2.5E-04 | 8.4E-04                       | 8.3E-05 | 1.7E-02 |
| Sacramento  | Su | 5.0E-03 | 1.0E-04 | 2.9E-04 | 1.6E-04 | 5.3E-02 | 8.5E-03 | 1.5E-02 | 2.2E-04 | 8.6E-04         | 1.1E-01         | 8.6E-04 | 1.6E-04                      | 3.7E-01 | 4.0E-04 | 2.2E-04 | 8.6E-04                       | 1.6E-04 | 1.5E-02 |
| Sacramento  | F  | 3.4E-03 | 8.9E-05 | 2.5E-04 | 1.1E-04 | 7.4E-02 | 9.0E-03 | 7.9E-03 | 2.3E-04 | 3.4E-04         | 1.6E-01         | 3.4E-04 | 1.4E-04                      | 4.8E-01 | 2.5E-04 | 2.3E-04 | 3.4E-04                       | 1.4E-04 | 1.4E-02 |
| Fresno      | W  | 2.2E-04 | 9.2E-05 | 1.3E-04 | 6.6E-05 | 5.0E-02 | 2.9E-03 | 6.7E-03 | 7.4E-05 | 1.2E-04         | 3.2E-01         | 1.2E-04 | 2.8E-05                      | 4.5E-01 | 2.3E-04 | 7.4E-05 | 1.2E-04                       | 2.8E-05 | 2.5E-03 |
| Fresno      | Sp | 5.7E-03 | 1.1E-04 | 2.5E-04 | 1.2E-04 | 5.6E-02 | 9.4E-03 | 7.5E-03 | 2.2E-04 | 6.6E-04         | 3.0E-01         | 6.6E-04 | 7.6E-05                      | 3.9E-01 | 3.4E-04 | 2.2E-04 | 6.6E-04                       | 7.6E-05 | 2.1E-02 |
| Fresno      | Su | 5.5E-03 | 8.9E-05 | 3.1E-04 | 1.9E-04 | 5.6E-02 | 1.0E-02 | 1.3E-02 | 2.2E-04 | 3.2E-04         | 1.5E-01         | 3.2E-04 | 1.5E-04                      | 4.6E-01 | 3.1E-04 | 2.2E-04 | 3.2E-04                       | 1.5E-04 | 2.1E-02 |
| Fresno      | F  | 4.0E-03 | 8.1E-05 | 2.8E-04 | 7.8E-05 | 6.1E-02 | 8.6E-03 | 8.4E-03 | 1.7E-04 | 1.5E-04         | 3.5E-01         | 1.5E-04 | 6.7E-05                      | 4.2E-01 | 2.4E-04 | 1.7E-04 | 1.5E-04                       | 6.7E-05 | 1.5E-02 |
| Bakersfield | W  | 9.4E-04 | 7.6E-05 | 2.3E-04 | 1.5E-04 | 5.4E-02 | 5.0E-03 | 5.6E-03 | 6.6E-05 | 5.2E-05         | 3.9E-01         | 5.2E-05 | 4.9E-05                      | 3.2E-01 | 1.6E-04 | 6.6E-05 | 5.2E-05                       | 4.9E-05 | 6.2E-03 |
| Bakersfield | Sp | 5.9E-03 | 1.1E-04 | 3.0E-04 | 1.4E-04 | 6.0E-02 | 9.7E-03 | 6.3E-03 | 2.2E-04 | 6.9E-05         | 3.4E-01         | 6.9E-05 | 6.6E-05                      | 3.3E-01 | 2.2E-04 | 2.2E-04 | 6.9E-05                       | 6.6E-05 | 2.0E-02 |
| Bakersfield | Su | 6.5E-03 | 8.8E-05 | 4.3E-04 | 1.3E-04 | 5.7E-02 | 1.2E-02 | 1.5E-02 | 2.1E-04 | 9.8E-05         | 1.2E-01         | 9.8E-05 | 1.1E-04                      | 4.0E-01 | 2.4E-04 | 2.1E-04 | 9.8E-05                       | 1.1E-04 | 2.6E-02 |
| Bakersfield | F  | 5.5E-03 | 6.4E-05 | 3.8E-04 | 1.8E-04 | 6.8E-02 | 1.2E-02 | 8.1E-03 | 2.1E-04 | 6.4E-05         | 2.7E-01         | 6.4E-05 | 8.2E-05                      | 3.5E-01 | 1.7E-04 | 2.1E-04 | 6.4E-05                       | 8.2E-05 | 2.3E-02 |
| LA          | W  | 3.7E-03 | 5.4E-05 | 2.2E-04 | 3.2E-04 | 1.2E-01 | 3.1E-02 | 7.0E-03 | 3.9E-04 | 1.4E-04         | 2.6E-01         | 1.4E-04 | 2.2E-04                      | 3.6E-01 | 4.6E-04 | 3.9E-04 | 1.4E-04                       | 2.2E-04 | 2.5E-02 |
| LA          | Sp | 1.8E-03 | 1.2E-04 | 3.2E-04 | 2.2E-04 | 1.1E-01 | 1.8E-02 | 6.9E-03 | 4.8E-04 | 1.8E-04         | 4.1E-01         | 1.8E-04 | 3.9E-04                      | 4.0E-01 | 2.9E-04 | 4.8E-04 | 1.8E-04                       | 3.9E-04 | 1.7E-02 |
| LA          | Su | 4.9E-04 | 4.1E-05 | 3.6E-04 | 1.2E-04 | 5.7E-02 | 7.7E-03 | 4.0E-03 | 2.9E-04 | 1.6E-04         | 3.7E-01         | 1.6E-04 | 4.1E-04                      | 2.4E-01 | 3.1E-04 | 2.9E-04 | 1.6E-04                       | 4.1E-04 | 5.2E-03 |
| LA          | F  | 1.1E-03 | 6.1E-05 | 3.0E-04 | 1.1E-04 | 8.6E-02 | 1.3E-02 | 4.5E-03 | 2.8E-04 | 9.9E-05         | 3.3E-01         | 9.9E-05 | 3.4E-04                      | 3.6E-01 | 3.6E-04 | 2.8E-04 | 9.9E-05                       | 3.4E-04 | 7.6E-03 |
| Riverside   | W  | 2.9E-03 | 4.6E-05 | 2.0E-04 | 1.2E-04 | 9.4E-02 | 1.0E-02 | 5.8E-03 | 2.8E-04 | 6.9E-05         | 3.1E-01         | 6.9E-05 | 1.0E-04                      | 3.4E-01 | 4.2E-04 | 2.8E-04 | 6.9E-05                       | 1.0E-04 | 1.1E-02 |
| Riverside   | Sp | 2.7E-03 | 3.9E-05 | 2.3E-04 | 1.2E-04 | 5.4E-02 | 7.0E-03 | 3.7E-03 | 1.7E-04 | 8.0E-05         | 3.9E-01         | 8.0E-05 | 1.6E-04                      | 2.2E-01 | 3.0E-04 | 1.7E-04 | 8.0E-05                       | 1.6E-04 | 1.1E-02 |
| Riverside   | Su | 2.0E-03 | 4.4E-05 | 2.7E-04 | 1.6E-04 | 4.0E-02 | 5.9E-03 | 6.7E-03 | 1.2E-04 | 1.3E-04         | 4.6E-01         | 1.3E-04 | 2.5E-04                      | 2.5E-01 | 1.6E-04 | 1.2E-04 | 1.3E-04                       | 2.5E-04 | 7.3E-03 |
| Riverside   | F  | 2.0E-03 | 5.1E-05 | 2.4E-04 | 9.5E-05 | 5.7E-02 | 7.6E-03 | 4.1E-03 | 1.8E-04 | 7.7E-05         | 4.0E-01         | 7.7E-05 | 1.9E-04                      | 2.5E-01 | 2.2E-04 | 1.8E-04 | 7.7E-05                       | 1.9E-04 | 8.9E-03 |
| San Diego   | W  | 2.9E-03 | 6.8E-05 | 2.6E-04 | 1.6E-04 | 9.6E-02 | 9.5E-03 | 8.5E-03 | 1.9E-04 | 1.1E-04         | 2.5E-01         | 1.1E-04 | 2.0E-04                      | 5.0E-01 | 3.8E-04 | 1.9E-04 | 1.1E-04                       | 2.0E-04 | 1.0E-02 |
| San Diego   | Sp | 3.8E-03 | 9.5E-05 | 3.3E-04 | 1.3E-04 | 5.8E-02 | 7.9E-03 | 6.0E-03 | 1.7E-04 | 1.7E-04         | 2.5E-01         | 1.7E-04 | 2.3E-04                      | 3.0E-01 | 2.9E-04 | 1.7E-04 | 1.7E-04                       | 2.3E-04 | 1.5E-02 |
| San Diego   | Su | 1.7E-03 | 4.7E-05 | 3.1E-04 | 1.4E-04 | 4.4E-02 | 6.2E-03 | 5.4E-03 | 1.7E-04 | 1.8E-04         | 2.5E-01         | 1.8E-04 | 3.6E-04                      | 2.5E-01 | 2.1E-04 | 1.7E-04 | 1.8E-04                       | 3.6E-04 | 7.7E-03 |
| San Diego   | F  | 3.1E-03 | 6.0E-05 | 2.8E-04 | 2.1E-04 | 5.8E-02 | 8.6E-03 | 5.0E-03 | 2.5E-04 | 1.4E-04         | 2.6E-01         | 1.4E-04 | 3.1E-04                      | 3.1E-01 | 2.9E-04 | 2.5E-04 | 1.4E-04                       | 3.1E-04 | 1.1E-02 |
| El Paso     | W  | 4.8E-03 | 1.4E-04 | 4.0E-04 | 1.4E-04 | 1.0E-01 | 9.8E-03 | 6.1E-03 | 3.7E-04 | 5.2E-05         | 1.0E-01         | 5.2E-05 | 9.8E-05                      | 2.6E-01 | 5.1E-04 | 3.7E-04 | 5.2E-05                       | 9.8E-05 | 2.1E-02 |
| El Paso     | Sp | 1.5E-02 | 1.0E-04 | 4.1E-04 | 1.7E-04 | 6.8E-02 | 1.3E-02 | 8.5E-03 | 4.2E-04 | 3.0E-05         | 4.3E-02         | 3.0E-05 | 1.1E-04                      | 2.4E-01 | 4.7E-04 | 4.2E-04 | 3.0E-05                       | 1.1E-04 | 4.6E-02 |
| El Paso     | Su | 1.4E-02 | 6.8E-05 | 2.9E-04 | 1.1E-04 | 5.8E-02 | 1.2E-02 | 8.2E-03 | 3.5E-04 | 4.2E-05         | 2.7E-02         | 4.2E-05 | 2.0E-04                      | 2.3E-01 | 2.8E-04 | 3.5E-04 | 4.2E-05                       | 2.0E-04 | 4.4E-02 |
| El Paso     | F  | 4.3E-03 | 1.1E-04 | 2.8E-04 | 1.4E-04 | 8.0E-02 | 9.0E-03 | 5.5E-03 | 3.2E-04 | 3.0E-05         | 3.9E-02         | 3.0E-05 | 1.3E-04                      | 2.9E-01 | 3.7E-04 | 3.2E-04 | 3.0E-05                       | 1.3E-04 | 2.2E-02 |
| Dallas      | W  | 7.8E-04 | 9.7E-05 | 2.8E-04 | 4.9E-05 | 6.3E-02 | 6.3E-03 | 5.3E-03 | 1.5E-04 | 3.8E-05         | 1.8E-01         | 3.8E-05 | 8.1E-05                      | 2.0E-01 | 5.6E-04 | 1.5E-04 | 3.8E-05                       | 8.1E-05 | 6.6E-03 |

|            |    |         |         |         |         |         |         |         |         |         |         |         |         |         |         |         |         |         |         |
|------------|----|---------|---------|---------|---------|---------|---------|---------|---------|---------|---------|---------|---------|---------|---------|---------|---------|---------|---------|
| Dallas     | Sp | 2.2E-03 | 6.2E-05 | 3.3E-04 | 6.6E-05 | 4.7E-02 | 5.6E-03 | 6.1E-03 | 1.2E-04 | 4.6E-05 | 1.0E-01 | 4.6E-05 | 7.7E-05 | 1.6E-01 | 2.8E-04 | 1.2E-04 | 4.6E-05 | 7.7E-05 | 1.1E-02 |
| Dallas     | Su | 6.5E-03 | 5.2E-05 | 2.0E-04 | 7.0E-05 | 4.0E-02 | 8.2E-03 | 5.5E-03 | 1.2E-04 | 3.1E-05 | 3.8E-02 | 3.1E-05 | 1.2E-04 | 1.3E-01 | 2.1E-04 | 1.2E-04 | 3.1E-05 | 1.2E-04 | 2.2E-02 |
| Dallas     | F  | 9.8E-04 | 7.8E-05 | 3.0E-04 | 6.8E-05 | 6.3E-02 | 6.5E-03 | 4.8E-03 | 1.4E-04 | 4.7E-05 | 6.6E-02 | 4.7E-05 | 7.1E-05 | 2.0E-01 | 3.6E-04 | 1.4E-04 | 4.7E-05 | 7.1E-05 | 7.1E-03 |
| Houston    | W  | 5.8E-04 | 1.0E-04 | 3.2E-04 | 6.3E-05 | 3.8E-02 | 3.9E-03 | 5.1E-03 | 1.1E-04 | 1.9E-04 | 1.1E-01 | 1.9E-04 | 4.1E-04 | 2.2E-01 | 2.3E-04 | 1.1E-04 | 1.9E-04 | 4.1E-04 | 7.5E-03 |
| Houston    | Sp | 2.0E-03 | 9.5E-05 | 3.1E-04 | 4.6E-05 | 2.7E-02 | 3.7E-03 | 6.1E-03 | 8.5E-05 | 1.3E-04 | 6.5E-02 | 1.3E-04 | 3.0E-04 | 2.0E-01 | 1.6E-04 | 8.5E-05 | 1.3E-04 | 3.0E-04 | 1.0E-02 |
| Houston    | Su | 1.1E-02 | 1.5E-04 | 1.5E-04 | 6.8E-05 | 2.4E-02 | 1.0E-02 | 6.0E-03 | 1.6E-04 | 1.4E-04 | 3.7E-02 | 1.4E-04 | 2.8E-04 | 1.8E-01 | 1.0E-04 | 1.6E-04 | 1.4E-04 | 2.8E-04 | 3.3E-02 |
| Houston    | F  | 1.1E-03 | 1.4E-04 | 2.7E-04 | 6.9E-05 | 3.5E-02 | 4.1E-03 | 4.7E-03 | 1.2E-04 | 1.6E-04 | 4.8E-02 | 1.6E-04 | 3.4E-04 | 2.6E-01 | 2.0E-04 | 1.2E-04 | 1.6E-04 | 3.4E-04 | 8.1E-03 |
| Beaumont   | W  | 9.7E-04 | 4.6E-05 | 3.0E-04 | 5.9E-05 | 3.5E-02 | 2.3E-03 | 7.1E-03 | 1.2E-04 | 1.1E-04 | 7.7E-02 | 1.1E-04 | 3.8E-04 | 3.2E-01 | 2.4E-04 | 1.2E-04 | 1.1E-04 | 3.8E-04 | 5.4E-03 |
| Beaumont   | Sp | 2.5E-03 | 1.4E-04 | 3.2E-04 | 5.5E-05 | 2.8E-02 | 3.6E-03 | 7.1E-03 | 1.1E-04 | 8.9E-05 | 4.2E-02 | 8.9E-05 | 3.0E-04 | 2.5E-01 | 2.0E-04 | 1.1E-04 | 8.9E-05 | 3.0E-04 | 1.1E-02 |
| Beaumont   | Su | 1.2E-02 | 1.5E-04 | 1.6E-04 | 8.8E-05 | 2.5E-02 | 1.0E-02 | 7.7E-03 | 1.4E-04 | 9.7E-05 | 2.6E-02 | 9.7E-05 | 3.0E-04 | 3.0E-01 | 1.9E-04 | 1.4E-04 | 9.7E-05 | 3.0E-04 | 3.4E-02 |
| Beaumont   | F  | 9.4E-04 | 9.6E-05 | 2.7E-04 | 4.3E-05 | 3.0E-02 | 2.7E-03 | 5.9E-03 | 1.2E-04 | 8.4E-05 | 5.1E-02 | 8.4E-05 | 2.7E-04 | 2.6E-01 | 2.4E-04 | 1.2E-04 | 8.4E-05 | 2.7E-04 | 6.9E-03 |
| KansasCity | W  | 8.7E-04 | 6.2E-05 | 2.1E-04 | 1.2E-04 | 2.5E-02 | 3.3E-03 | 4.8E-03 | 9.6E-05 | 4.2E-05 | 2.9E-01 | 4.2E-05 | 4.3E-05 | 1.5E-01 | 2.0E-04 | 9.6E-05 | 4.2E-05 | 4.3E-05 | 6.0E-03 |
| KansasCity | Sp | 2.4E-03 | 7.0E-05 | 3.6E-04 | 4.9E-05 | 2.6E-02 | 4.0E-03 | 5.8E-03 | 1.1E-04 | 2.8E-05 | 1.9E-01 | 2.8E-05 | 4.9E-05 | 1.4E-01 | 2.1E-04 | 1.1E-04 | 2.8E-05 | 4.9E-05 | 1.2E-02 |
| KansasCity | Su | 2.6E-03 | 7.2E-05 | 2.3E-04 | 5.3E-05 | 2.7E-02 | 4.8E-03 | 5.6E-03 | 1.0E-04 | 2.8E-05 | 4.9E-02 | 2.8E-05 | 6.1E-05 | 2.0E-01 | 2.0E-04 | 1.0E-04 | 2.8E-05 | 6.1E-05 | 1.3E-02 |
| KansasCity | F  | 1.3E-03 | 7.9E-05 | 2.7E-04 | 3.7E-05 | 3.4E-02 | 4.3E-03 | 5.3E-03 | 1.3E-04 | 1.1E-05 | 1.5E-01 | 1.1E-05 | 5.8E-05 | 1.8E-01 | 2.5E-04 | 1.3E-04 | 1.1E-05 | 5.8E-05 | 8.2E-03 |
| Minneap    | W  | 1.6E-03 | 1.1E-04 | 2.6E-04 | 4.7E-04 | 5.0E-02 | 5.9E-03 | 5.2E-03 | 1.7E-04 | 4.5E-04 | 3.5E-01 | 4.5E-04 | 7.6E-04 | 2.7E-01 | 3.5E-04 | 1.7E-04 | 4.5E-04 | 7.6E-04 | 6.5E-03 |
| Minneap    | Sp | 3.1E-03 | 1.8E-04 | 2.8E-04 | 2.4E-04 | 5.5E-02 | 7.9E-03 | 6.2E-03 | 2.8E-04 | 2.2E-04 | 2.4E-01 | 2.2E-04 | 2.9E-04 | 2.5E-01 | 3.4E-04 | 2.8E-04 | 2.2E-04 | 2.9E-04 | 1.4E-02 |
| Minneap    | Su | 2.9E-03 | 1.4E-04 | 2.2E-04 | 2.8E-04 | 5.8E-02 | 9.8E-03 | 1.2E-02 | 3.0E-04 | 1.6E-04 | 6.7E-02 | 1.6E-04 | 1.5E-04 | 3.0E-01 | 4.4E-04 | 3.0E-04 | 1.6E-04 | 1.5E-04 | 1.6E-02 |
| Minneap    | F  | 2.2E-03 | 1.8E-04 | 2.2E-04 | 1.9E-04 | 6.8E-02 | 7.6E-03 | 7.0E-03 | 2.6E-04 | 8.3E-05 | 1.8E-01 | 8.3E-05 | 1.2E-04 | 2.8E-01 | 3.6E-04 | 2.6E-04 | 8.3E-05 | 1.2E-04 | 1.1E-02 |
| St Louis   | W  | 1.1E-03 | 1.4E-04 | 2.9E-04 | 2.1E-04 | 5.4E-02 | 1.3E-02 | 4.3E-03 | 7.1E-04 | 9.5E-05 | 3.0E-01 | 9.5E-05 | 7.5E-05 | 2.2E-01 | 9.7E-04 | 7.1E-04 | 9.5E-05 | 7.5E-05 | 5.4E-03 |
| St Louis   | Sp | 3.4E-03 | 1.6E-04 | 3.2E-04 | 2.2E-04 | 6.3E-02 | 1.6E-02 | 5.7E-03 | 8.8E-04 | 1.5E-04 | 1.9E-01 | 1.5E-04 | 8.4E-05 | 2.8E-01 | 8.2E-04 | 8.8E-04 | 1.5E-04 | 8.4E-05 | 1.3E-02 |
| St Louis   | Su | 3.2E-03 | 1.3E-04 | 2.0E-04 | 1.2E-04 | 5.9E-02 | 1.6E-02 | 7.3E-03 | 8.8E-04 | 6.4E-05 | 5.8E-02 | 6.4E-05 | 1.1E-04 | 2.9E-01 | 7.4E-04 | 8.8E-04 | 6.4E-05 | 1.1E-04 | 1.3E-02 |
| St Louis   | F  | 1.2E-03 | 1.9E-04 | 3.1E-04 | 1.9E-04 | 7.8E-02 | 1.5E-02 | 5.5E-03 | 7.3E-04 | 9.0E-05 | 1.3E-01 | 9.0E-05 | 9.8E-05 | 3.0E-01 | 1.1E-03 | 7.3E-04 | 9.0E-05 | 9.8E-05 | 6.7E-03 |
| Dayton     | W  | 8.1E-04 | 1.3E-04 | 2.6E-04 | 9.5E-05 | 4.3E-02 | 4.9E-03 | 4.3E-03 | 2.2E-04 | 4.0E-05 | 3.0E-01 | 4.0E-05 | 6.0E-05 | 2.5E-01 | 2.7E-04 | 2.2E-04 | 4.0E-05 | 6.0E-05 | 4.1E-03 |
| Dayton     | Sp | 2.5E-03 | 1.8E-04 | 2.8E-04 | 8.8E-05 | 4.1E-02 | 5.0E-03 | 4.7E-03 | 1.7E-04 | 5.6E-05 | 2.3E-01 | 5.6E-05 | 7.0E-05 | 1.9E-01 | 3.6E-04 | 1.7E-04 | 5.6E-05 | 7.0E-05 | 8.3E-03 |
| Dayton     | Su | 1.8E-03 | 8.8E-05 | 1.2E-04 | 5.7E-05 | 3.3E-02 | 4.1E-03 | 3.3E-03 | 9.9E-05 | 4.4E-05 | 9.3E-02 | 4.4E-05 | 7.2E-05 | 2.2E-01 | 2.1E-04 | 9.9E-05 | 4.4E-05 | 7.2E-05 | 6.9E-03 |
| Dayton     | F  | 8.0E-04 | 1.9E-04 | 2.0E-04 | 1.4E-04 | 4.9E-02 | 5.7E-03 | 4.6E-03 | 2.4E-04 | 6.8E-05 | 1.5E-01 | 6.8E-05 | 7.1E-05 | 2.6E-01 | 3.7E-04 | 2.4E-04 | 6.8E-05 | 7.1E-05 | 4.3E-03 |
| Toledo     | W  | 1.1E-03 | 8.0E-05 | 2.3E-04 | 1.4E-04 | 5.2E-02 | 4.1E-03 | 3.7E-03 | 2.0E-04 | 9.8E-05 | 2.7E-01 | 9.8E-05 | 1.0E-04 | 2.5E-01 | 2.9E-04 | 2.0E-04 | 9.8E-05 | 1.0E-04 | 3.2E-03 |
| Toledo     | Sp | 2.4E-03 | 1.3E-04 | 2.7E-04 | 1.0E-04 | 5.8E-02 | 6.6E-03 | 4.0E-03 | 1.6E-04 | 7.4E-05 | 2.6E-01 | 7.4E-05 | 1.4E-04 | 1.8E-01 | 3.2E-04 | 1.6E-04 | 7.4E-05 | 1.4E-04 | 7.9E-03 |
| Toledo     | Su | 6.6E-04 | 1.6E-04 | 1.8E-04 | 8.4E-05 | 4.6E-02 | 6.2E-03 | 5.3E-03 | 1.4E-04 | 7.1E-05 | 7.8E-02 | 7.1E-05 | 1.1E-04 | 2.6E-01 | 1.9E-04 | 1.4E-04 | 7.1E-05 | 1.1E-04 | 6.0E-03 |
| Toledo     | F  | 6.2E-04 | 1.5E-04 | 2.3E-04 | 1.6E-04 | 6.2E-02 | 7.2E-03 | 4.4E-03 | 1.9E-04 | 7.6E-05 | 1.8E-01 | 7.6E-05 | 1.3E-04 | 2.3E-01 | 3.6E-04 | 1.9E-04 | 7.6E-05 | 1.3E-04 | 5.3E-03 |
| Detroit    | W  | 7.2E-04 | 1.3E-04 | 1.9E-04 | 2.1E-04 | 5.8E-02 | 6.9E-03 | 3.8E-03 | 2.8E-04 | 1.2E-04 | 3.1E-01 | 1.2E-04 | 7.9E-05 | 2.5E-01 | 3.0E-04 | 2.8E-04 | 1.2E-04 | 7.9E-05 | 4.1E-03 |
| Detroit    | Sp | 2.0E-03 | 1.1E-04 | 2.6E-04 | 1.4E-04 | 5.7E-02 | 9.9E-03 | 4.2E-03 | 3.5E-04 | 1.5E-04 | 2.4E-01 | 1.5E-04 | 1.5E-04 | 2.4E-01 | 4.5E-04 | 3.5E-04 | 1.5E-04 | 1.5E-04 | 9.0E-03 |
| Detroit    | Su | 2.1E-03 | 1.5E-04 | 1.9E-04 | 1.6E-04 | 6.0E-02 | 9.3E-03 | 7.7E-03 | 2.8E-04 | 1.4E-04 | 8.8E-02 | 1.4E-04 | 1.1E-04 | 2.7E-01 | 3.9E-04 | 2.8E-04 | 1.4E-04 | 1.1E-04 | 7.8E-03 |
| Detroit    | F  | 8.3E-04 | 1.7E-04 | 1.9E-04 | 2.0E-04 | 7.4E-02 | 9.2E-03 | 4.6E-03 | 3.3E-04 | 1.0E-04 | 1.6E-01 | 1.0E-04 | 1.2E-04 | 2.6E-01 | 4.7E-04 | 3.3E-04 | 1.0E-04 | 1.2E-04 | 5.8E-03 |
| Columbus   | W  | 5.9E-04 | 6.9E-05 | 2.4E-04 | 1.0E-04 | 4.1E-02 | 3.5E-03 | 4.6E-03 | 1.5E-04 | 7.3E-05 | 2.6E-01 | 7.3E-05 | 5.6E-05 | 1.7E-01 | 3.9E-04 | 1.5E-04 | 7.3E-05 | 5.6E-05 | 3.0E-03 |

|            |    |         |         |         |         |         |         |         |         |         |         |         |         |         |         |         |         |         |         |
|------------|----|---------|---------|---------|---------|---------|---------|---------|---------|---------|---------|---------|---------|---------|---------|---------|---------|---------|---------|
| Columbus   | Sp | 2.1E-03 | 9.0E-05 | 1.3E-04 | 8.0E-05 | 4.1E-02 | 4.7E-03 | 3.5E-03 | 1.3E-04 | 3.8E-05 | 1.5E-01 | 3.8E-05 | 3.9E-05 | 1.7E-01 | 2.6E-04 | 1.3E-04 | 3.8E-05 | 3.9E-05 | 8.3E-03 |
| Columbus   | Su | 1.6E-03 | 7.9E-05 | 9.0E-05 | 9.5E-05 | 3.2E-02 | 4.7E-03 | 3.1E-03 | 1.4E-04 | 7.5E-05 | 7.6E-02 | 7.5E-05 | 4.3E-05 | 1.6E-01 | 1.6E-04 | 1.4E-04 | 7.5E-05 | 4.3E-05 | 7.5E-03 |
| Columbus   | F  | 1.3E-03 | 1.1E-04 | 1.6E-04 | 8.6E-05 | 5.0E-02 | 5.3E-03 | 3.7E-03 | 1.9E-04 | 2.8E-05 | 1.4E-01 | 2.8E-05 | 1.1E-04 | 2.1E-01 | 3.9E-04 | 1.9E-04 | 2.8E-05 | 1.1E-04 | 5.4E-03 |
| Cleveland  | W  | 8.5E-04 | 1.6E-04 | 2.8E-04 | 2.7E-04 | 6.2E-02 | 1.1E-02 | 6.3E-03 | 3.5E-04 | 2.0E-04 | 2.8E-01 | 2.0E-04 | 1.2E-04 | 2.0E-01 | 6.6E-04 | 3.5E-04 | 2.0E-04 | 1.2E-04 | 7.0E-03 |
| Cleveland  | Sp | 2.3E-03 | 1.3E-04 | 3.5E-04 | 2.0E-04 | 7.4E-02 | 1.9E-02 | 8.3E-03 | 6.7E-04 | 1.6E-04 | 2.5E-01 | 1.6E-04 | 1.1E-04 | 2.5E-01 | 8.6E-04 | 6.7E-04 | 1.6E-04 | 1.1E-04 | 1.1E-02 |
| Cleveland  | Su | 2.4E-03 | 1.2E-04 | 2.2E-04 | 1.8E-04 | 8.2E-02 | 1.7E-02 | 7.4E-03 | 4.5E-04 | 1.3E-04 | 8.3E-02 | 1.3E-04 | 8.2E-05 | 2.9E-01 | 5.8E-04 | 4.5E-04 | 1.3E-04 | 8.2E-05 | 1.0E-02 |
| Cleveland  | F  | 1.7E-03 | 2.0E-04 | 2.8E-04 | 2.2E-04 | 9.0E-02 | 2.0E-02 | 8.5E-03 | 6.3E-04 | 1.6E-04 | 1.4E-01 | 1.6E-04 | 1.0E-04 | 2.5E-01 | 8.0E-04 | 6.3E-04 | 1.6E-04 | 1.0E-04 | 9.9E-03 |
| Akron      | W  | 6.8E-04 | 1.2E-04 | 2.9E-04 | 1.6E-04 | 4.2E-02 | 4.1E-03 | 4.6E-03 | 2.9E-04 | 7.6E-05 | 2.4E-01 | 7.6E-05 | 1.2E-04 | 2.8E-01 | 4.8E-04 | 2.9E-04 | 7.6E-05 | 1.2E-04 | 4.1E-03 |
| Akron      | Sp | 1.2E-03 | 1.3E-04 | 2.9E-04 | 1.5E-04 | 4.2E-02 | 4.9E-03 | 3.8E-03 | 2.1E-04 | 8.0E-05 | 1.9E-01 | 8.0E-05 | 4.9E-05 | 2.3E-01 | 3.3E-04 | 2.1E-04 | 8.0E-05 | 4.9E-05 | 7.0E-03 |
| Akron      | Su | 6.7E-04 | 1.4E-04 | 1.6E-04 | 7.9E-05 | 3.4E-02 | 4.1E-03 | 3.6E-03 | 1.8E-04 | 4.5E-05 | 5.6E-02 | 4.5E-05 | 5.3E-05 | 2.5E-01 | 3.7E-04 | 1.8E-04 | 4.5E-05 | 5.3E-05 | 4.3E-03 |
| Akron      | F  | 4.4E-04 | 2.1E-04 | 2.7E-04 | 1.4E-04 | 5.2E-02 | 6.3E-03 | 4.4E-03 | 3.4E-04 | 4.8E-05 | 1.3E-01 | 4.8E-05 | 1.0E-04 | 2.6E-01 | 4.5E-04 | 3.4E-04 | 4.8E-05 | 1.0E-04 | 4.9E-03 |
| Erie       | W  | 8.5E-04 | 9.1E-05 | 3.9E-04 | 1.2E-04 | 6.9E-02 | 6.6E-03 | 4.6E-03 | 5.9E-04 | 3.1E-04 | 2.5E-01 | 3.1E-04 | 7.0E-05 | 2.1E-01 | 4.3E-04 | 5.9E-04 | 3.1E-04 | 7.0E-05 | 5.5E-03 |
| Erie       | Sp | 1.4E-02 | 1.2E-04 | 1.1E-03 | 3.5E-04 | 1.4E-01 | 5.8E-02 | 2.0E-02 | 2.6E-03 | 4.3E-04 | 6.3E-01 | 4.3E-04 | 4.4E-04 | 2.0E-01 | 1.6E-03 | 2.6E-03 | 4.3E-04 | 4.4E-04 | 7.0E-02 |
| Erie       | Su | 1.4E-03 | 2.2E-04 | 1.8E-04 | 1.2E-04 | 3.8E-02 | 6.7E-03 | 3.4E-03 | 3.8E-04 | 8.3E-05 | 4.9E-02 | 8.3E-05 | 4.4E-05 | 1.7E-01 | 3.1E-04 | 3.8E-04 | 8.3E-05 | 4.4E-05 | 6.4E-03 |
| Erie       | F  | 1.1E-03 | 2.4E-04 | 2.7E-04 | 1.9E-04 | 5.8E-02 | 9.5E-03 | 3.7E-03 | 8.8E-04 | 1.0E-04 | 1.2E-01 | 1.0E-04 | 1.2E-04 | 2.3E-01 | 4.3E-04 | 8.8E-04 | 1.0E-04 | 1.2E-04 | 4.8E-03 |
| Pittsburgh | W  | 7.2E-04 | 1.7E-04 | 3.8E-04 | 3.3E-04 | 6.0E-02 | 8.5E-03 | 5.7E-03 | 4.8E-04 | 1.9E-04 | 2.7E-01 | 1.9E-04 | 9.2E-05 | 2.8E-01 | 8.9E-04 | 4.8E-04 | 1.9E-04 | 9.2E-05 | 5.5E-03 |
| Pittsburgh | Sp | 2.3E-03 | 1.8E-04 | 3.8E-04 | 3.5E-04 | 6.8E-02 | 9.6E-03 | 5.0E-03 | 6.2E-04 | 1.7E-04 | 1.4E-01 | 1.7E-04 | 7.4E-05 | 2.0E-01 | 1.2E-03 | 6.2E-04 | 1.7E-04 | 7.4E-05 | 9.5E-03 |
| Pittsburgh | Su | 2.3E-03 | 1.4E-04 | 1.8E-04 | 2.1E-04 | 4.3E-02 | 7.0E-03 | 4.2E-03 | 4.0E-04 | 1.3E-04 | 4.6E-02 | 1.3E-04 | 7.0E-05 | 2.5E-01 | 6.7E-04 | 4.0E-04 | 1.3E-04 | 7.0E-05 | 2.9E-02 |
| Pittsburgh | F  | 8.5E-04 | 2.0E-04 | 3.4E-04 | 4.8E-04 | 7.0E-02 | 9.5E-03 | 5.3E-03 | 6.7E-04 | 2.0E-04 | 1.3E-01 | 2.0E-04 | 9.6E-05 | 2.7E-01 | 8.2E-04 | 6.7E-04 | 2.0E-04 | 9.6E-05 | 6.4E-03 |
| Harrisburg | W  | 2.2E-04 | 1.2E-04 | 5.7E-04 | 1.4E-04 | 6.6E-02 | 5.4E-03 | 5.2E-03 | 2.6E-04 | 2.4E-04 | 2.2E-01 | 2.4E-04 | 3.8E-04 | 2.9E-01 | 6.0E-04 | 2.6E-04 | 2.4E-04 | 3.8E-04 | 4.2E-03 |
| Harrisburg | Sp | 2.5E-03 | 9.0E-05 | 4.2E-04 | 8.9E-05 | 5.6E-02 | 6.9E-03 | 5.6E-03 | 3.3E-04 | 1.7E-04 | 2.4E-01 | 1.7E-04 | 1.8E-04 | 2.6E-01 | 7.6E-04 | 3.3E-04 | 1.7E-04 | 1.8E-04 | 1.2E-02 |
| Harrisburg | Su | 1.5E-03 | 7.2E-05 | 1.8E-04 | 8.4E-05 | 4.7E-02 | 4.1E-03 | 2.9E-03 | 1.8E-04 | 7.8E-05 | 9.7E-02 | 7.8E-05 | 9.8E-05 | 3.0E-01 | 3.9E-04 | 1.8E-04 | 7.8E-05 | 9.8E-05 | 3.6E-03 |
| Harrisburg | F  | 3.2E-04 | 1.1E-04 | 3.5E-04 | 1.3E-04 | 7.1E-02 | 5.5E-03 | 4.1E-03 | 4.2E-04 | 6.1E-05 | 1.5E-01 | 6.1E-05 | 1.2E-04 | 2.9E-01 | 5.0E-04 | 4.2E-04 | 6.1E-05 | 1.2E-04 | 3.4E-03 |
| Philadelph | W  | 1.0E-03 | 1.1E-04 | 3.7E-04 | 2.1E-04 | 7.4E-02 | 6.3E-03 | 3.8E-03 | 1.9E-04 | 6.2E-04 | 2.7E-01 | 6.2E-04 | 3.2E-04 | 2.4E-01 | 4.5E-04 | 1.9E-04 | 6.2E-04 | 3.2E-04 | 4.5E-03 |
| Philadelph | Sp | 2.1E-03 | 9.9E-05 | 3.0E-04 | 1.8E-04 | 6.4E-02 | 7.7E-03 | 4.0E-03 | 1.8E-04 | 4.8E-04 | 1.7E-01 | 4.8E-04 | 3.2E-04 | 9.9E-01 | 3.8E-04 | 1.8E-04 | 4.8E-04 | 3.2E-04 | 9.7E-03 |
| Philadelph | Su | 2.0E-03 | 9.2E-05 | 2.1E-04 | 1.8E-04 | 5.2E-02 | 6.0E-03 | 4.3E-03 | 1.3E-04 | 2.7E-04 | 7.9E-02 | 2.7E-04 | 2.3E-04 | 1.8E-01 | 3.2E-04 | 1.3E-04 | 2.7E-04 | 2.3E-04 | 6.8E-03 |
| Philadelph | F  | 1.3E-03 | 1.1E-04 | 3.4E-04 | 2.3E-04 | 7.9E-02 | 8.5E-03 | 4.0E-03 | 2.3E-04 | 4.3E-04 | 1.4E-01 | 4.3E-04 | 3.1E-04 | 2.6E-01 | 4.7E-04 | 2.3E-04 | 4.3E-04 | 3.1E-04 | 5.1E-03 |
| Boston     | W  | 1.0E-03 | 6.0E-05 | 2.1E-04 | 5.2E-05 | 6.3E-02 | 6.2E-03 | 3.3E-03 | 9.2E-05 | 4.0E-04 | 1.2E-01 | 4.0E-04 | 3.9E-04 | 2.0E-01 | 1.9E-04 | 9.2E-05 | 4.0E-04 | 3.9E-04 | 5.0E-03 |
| Boston     | Sp | 2.1E-03 | 6.7E-05 | 2.4E-04 | 7.4E-05 | 6.9E-02 | 7.1E-03 | 3.7E-03 | 1.3E-04 | 2.7E-04 | 1.1E-01 | 2.7E-04 | 3.0E-04 | 2.7E-01 | 2.6E-04 | 1.3E-04 | 2.7E-04 | 3.0E-04 | 8.5E-03 |
| Boston     | Su | 1.7E-03 | 6.7E-05 | 1.5E-04 | 5.8E-05 | 6.4E-02 | 7.8E-03 | 4.5E-03 | 1.2E-04 | 1.8E-04 | 6.1E-02 | 1.8E-04 | 2.8E-04 | 3.1E-01 | 2.4E-04 | 1.2E-04 | 1.8E-04 | 2.8E-04 | 8.0E-03 |
| Boston     | F  | 8.7E-04 | 6.8E-05 | 2.0E-04 | 7.0E-05 | 8.3E-02 | 8.1E-03 | 3.4E-03 | 1.6E-04 | 3.2E-04 | 7.4E-02 | 3.2E-04 | 3.9E-04 | 2.7E-01 | 2.5E-04 | 1.6E-04 | 3.2E-04 | 3.9E-04 | 5.9E-03 |

Al indicates aluminum; As, arsenic; Br, bromine; Cr, chromium; EC, elemental carbon; Fe, iron; K, potassium; Mn, manganese; Na<sup>+</sup>, sodium ion; NO<sub>3</sub><sup>-</sup>, nitrate; Ni, nickel; NH<sub>4</sub><sup>+</sup>, ammonium ion; OC, organic carbon; Pb, lead; Si, silicon; SO<sub>4</sub><sup>2-</sup>, sulfate; V, vanadium; Zn, zinc.

eTable 2 Correlation matrix of unaveraged PM<sub>2.5</sub> species ratios

|                               | Al   | As    | Br   | Cr   | EC   | Fe   | K    | Mn   | Na <sup>+</sup> | NO <sub>3</sub> <sup>-</sup> | Ni   | NH <sub>4</sub> <sup>+</sup> | OC   | Pb   | Si   | SO <sub>4</sub> <sup>2-</sup> | V    | Zn   |
|-------------------------------|------|-------|------|------|------|------|------|------|-----------------|------------------------------|------|------------------------------|------|------|------|-------------------------------|------|------|
| Al                            | 1.00 | 0.00  | 0.21 | 0.05 | 0.18 | 0.50 | 0.36 | 0.30 | 0.15            | 0.11                         | 0.08 | 0.14                         | 0.18 | 0.15 | 0.59 | 0.21                          | 0.09 | 0.12 |
| As                            | 0.00 | 1.00  | 0.03 | 0.07 | 0.12 | 0.08 | 0.07 | 0.07 | -0.01           | -0.05                        | 0.05 | -0.03                        | 0.06 | 0.10 | 0.03 | 0.02                          | 0.04 | 0.11 |
| Br                            | 0.21 | 0.03  | 1.00 | 0.10 | 0.41 | 0.53 | 0.24 | 0.46 | 0.23            | 0.36                         | 0.08 | 0.46                         | 0.38 | 0.37 | 0.25 | 0.45                          | 0.21 | 0.33 |
| Cr                            | 0.05 | 0.07  | 0.10 | 1.00 | 0.16 | 0.24 | 0.06 | 0.20 | 0.08            | 0.09                         | 0.26 | 0.09                         | 0.11 | 0.14 | 0.06 | 0.07                          | 0.07 | 0.13 |
| EC                            | 0.18 | 0.12  | 0.41 | 0.16 | 1.00 | 0.61 | 0.19 | 0.51 | 0.12            | 0.27                         | 0.13 | 0.22                         | 0.64 | 0.40 | 0.20 | 0.20                          | 0.17 | 0.44 |
| Fe                            | 0.50 | 0.08  | 0.53 | 0.24 | 0.61 | 1.00 | 0.32 | 0.82 | 0.20            | 0.42                         | 0.14 | 0.53                         | 0.50 | 0.46 | 0.46 | 0.53                          | 0.20 | 0.52 |
| K                             | 0.36 | 0.07  | 0.24 | 0.06 | 0.19 | 0.32 | 1.00 | 0.25 | 0.18            | 0.20                         | 0.04 | 0.21                         | 0.26 | 0.29 | 0.20 | 0.29                          | 0.13 | 0.18 |
| Mn                            | 0.30 | 0.07  | 0.46 | 0.20 | 0.51 | 0.82 | 0.25 | 1.00 | 0.16            | 0.36                         | 0.11 | 0.49                         | 0.40 | 0.45 | 0.31 | 0.49                          | 0.17 | 0.48 |
| Na <sup>+</sup>               | 0.15 | -0.01 | 0.23 | 0.08 | 0.12 | 0.20 | 0.18 | 0.16 | 1.00            | 0.16                         | 0.16 | 0.08                         | 0.17 | 0.08 | 0.13 | 0.20                          | 0.20 | 0.01 |
| NO <sub>3</sub> <sup>-</sup>  | 0.11 | -0.05 | 0.36 | 0.09 | 0.27 | 0.42 | 0.20 | 0.36 | 0.16            | 1.00                         | 0.07 | 0.74                         | 0.28 | 0.22 | 0.14 | 0.26                          | 0.10 | 0.26 |
| Ni                            | 0.08 | 0.05  | 0.08 | 0.26 | 0.13 | 0.14 | 0.04 | 0.11 | 0.16            | 0.07                         | 1.00 | 0.06                         | 0.11 | 0.06 | 0.06 | 0.08                          | 0.21 | 0.04 |
| NH <sub>4</sub> <sup>+</sup>  | 0.14 | -0.03 | 0.46 | 0.09 | 0.22 | 0.53 | 0.21 | 0.49 | 0.08            | 0.74                         | 0.06 | 1.00                         | 0.21 | 0.28 | 0.20 | 0.78                          | 0.22 | 0.33 |
| OC                            | 0.18 | 0.06  | 0.38 | 0.11 | 0.64 | 0.50 | 0.26 | 0.40 | 0.17            | 0.28                         | 0.11 | 0.21                         | 1.00 | 0.31 | 0.21 | 0.20                          | 0.13 | 0.28 |
| Pb                            | 0.15 | 0.10  | 0.37 | 0.14 | 0.40 | 0.46 | 0.29 | 0.45 | 0.08            | 0.22                         | 0.06 | 0.28                         | 0.31 | 1.00 | 0.19 | 0.28                          | 0.07 | 0.48 |
| Si                            | 0.59 | 0.03  | 0.25 | 0.06 | 0.20 | 0.46 | 0.20 | 0.31 | 0.13            | 0.14                         | 0.06 | 0.20                         | 0.21 | 0.19 | 1.00 | 0.25                          | 0.10 | 0.15 |
| SO <sub>4</sub> <sup>2-</sup> | 0.21 | 0.02  | 0.45 | 0.07 | 0.20 | 0.53 | 0.29 | 0.49 | 0.20            | 0.26                         | 0.08 | 0.78                         | 0.20 | 0.28 | 0.25 | 1.00                          | 0.32 | 0.29 |
| V                             | 0.09 | 0.04  | 0.21 | 0.07 | 0.17 | 0.20 | 0.13 | 0.17 | 0.20            | 0.10                         | 0.21 | 0.22                         | 0.13 | 0.07 | 0.10 | 0.32                          | 1.00 | 0.10 |

|    |      |      |      |      |      |      |      |      |      |      |      |      |      |      |      |      |      |      |
|----|------|------|------|------|------|------|------|------|------|------|------|------|------|------|------|------|------|------|
| Zn | 0.12 | 0.11 | 0.33 | 0.13 | 0.44 | 0.52 | 0.18 | 0.48 | 0.01 | 0.26 | 0.04 | 0.33 | 0.28 | 0.48 | 0.15 | 0.29 | 0.10 | 1.00 |
|----|------|------|------|------|------|------|------|------|------|------|------|------|------|------|------|------|------|------|

eTable 3 Correlation matrix of community and seasonally averaged PM<sub>2.5</sub> species ratios

|                               | Al    | As    | Br   | Cr   | EC    | Fe   | K     | Mn   | Na <sup>+</sup> | NO <sub>3</sub> <sup>-</sup> | Ni   | NH <sub>4</sub> <sup>+</sup> | OC    | Pb    | Si    | SO <sub>4</sub> <sup>2-</sup> | V     | Zn    |
|-------------------------------|-------|-------|------|------|-------|------|-------|------|-----------------|------------------------------|------|------------------------------|-------|-------|-------|-------------------------------|-------|-------|
| Al                            | 1.00  | -0.06 | 0.35 | 0.05 | 0.15  | 0.51 | 0.58  | 0.32 | 0.18            | -0.04                        | 0.07 | 0.04                         | 0.34  | 0.10  | 0.93  | 0.16                          | 0.05  | 0.01  |
| As                            | -0.06 | 1.00  | 0.02 | 0.36 | 0.04  | 0.11 | -0.01 | 0.33 | -0.19           | -0.22                        | 0.02 | 0.06                         | -0.07 | 0.42  | -0.05 | 0.28                          | -0.22 | 0.33  |
| Br                            | 0.35  | 0.02  | 1.00 | 0.33 | 0.45  | 0.62 | 0.53  | 0.69 | 0.25            | 0.40                         | 0.18 | 0.60                         | 0.50  | 0.58  | 0.50  | 0.47                          | 0.25  | 0.44  |
| Cr                            | 0.05  | 0.36  | 0.33 | 1.00 | 0.47  | 0.46 | 0.25  | 0.51 | 0.12            | 0.29                         | 0.28 | 0.32                         | 0.29  | 0.59  | 0.15  | 0.17                          | 0.22  | 0.45  |
| EC                            | 0.15  | 0.04  | 0.45 | 0.47 | 1.00  | 0.69 | 0.35  | 0.56 | 0.14            | 0.35                         | 0.31 | 0.16                         | 0.67  | 0.52  | 0.28  | -0.04                         | 0.14  | 0.51  |
| Fe                            | 0.51  | 0.11  | 0.62 | 0.46 | 0.69  | 1.00 | 0.61  | 0.84 | 0.20            | 0.35                         | 0.14 | 0.50                         | 0.65  | 0.64  | 0.68  | 0.41                          | 0.13  | 0.58  |
| K                             | 0.58  | -0.01 | 0.53 | 0.25 | 0.35  | 0.61 | 1.00  | 0.47 | 0.36            | 0.17                         | 0.32 | 0.15                         | 0.70  | 0.29  | 0.65  | 0.17                          | 0.08  | 0.14  |
| Mn                            | 0.32  | 0.33  | 0.69 | 0.51 | 0.56  | 0.84 | 0.47  | 1.00 | 0.09            | 0.29                         | 0.11 | 0.60                         | 0.55  | 0.83  | 0.49  | 0.58                          | 0.07  | 0.67  |
| Na <sup>+</sup>               | 0.18  | -0.19 | 0.25 | 0.12 | 0.14  | 0.20 | 0.36  | 0.09 | 1.00            | 0.29                         | 0.51 | 0.10                         | 0.33  | -0.07 | 0.19  | 0.04                          | 0.39  | -0.22 |
| NO <sub>3</sub> <sup>-</sup>  | -0.04 | -0.22 | 0.40 | 0.29 | 0.35  | 0.35 | 0.17  | 0.29 | 0.29            | 1.00                         | 0.14 | 0.65                         | 0.44  | 0.19  | 0.06  | -0.08                         | 0.07  | 0.18  |
| Ni                            | 0.07  | 0.02  | 0.18 | 0.28 | 0.31  | 0.14 | 0.32  | 0.11 | 0.51            | 0.14                         | 1.00 | 0.01                         | 0.41  | 0.12  | 0.06  | 0.01                          | 0.34  | -0.01 |
| NH <sub>4</sub> <sup>+</sup>  | 0.04  | 0.06  | 0.60 | 0.32 | 0.16  | 0.50 | 0.15  | 0.60 | 0.10            | 0.65                         | 0.01 | 1.00                         | 0.29  | 0.49  | 0.19  | 0.68                          | 0.13  | 0.44  |
| OC                            | 0.34  | -0.07 | 0.50 | 0.29 | 0.67  | 0.65 | 0.70  | 0.55 | 0.33            | 0.44                         | 0.41 | 0.29                         | 1.00  | 0.33  | 0.47  | 0.11                          | 0.11  | 0.14  |
| Pb                            | 0.10  | 0.42  | 0.58 | 0.59 | 0.52  | 0.64 | 0.29  | 0.83 | -0.07           | 0.19                         | 0.12 | 0.49                         | 0.33  | 1.00  | 0.24  | 0.49                          | -0.04 | 0.80  |
| Si                            | 0.93  | -0.05 | 0.50 | 0.15 | 0.28  | 0.68 | 0.65  | 0.49 | 0.19            | 0.06                         | 0.06 | 0.19                         | 0.47  | 0.24  | 1.00  | 0.29                          | 0.08  | 0.13  |
| SO <sub>4</sub> <sup>2-</sup> | 0.16  | 0.28  | 0.47 | 0.17 | -0.04 | 0.41 | 0.17  | 0.58 | 0.04            | -0.08                        | 0.01 | 0.68                         | 0.11  | 0.49  | 0.29  | 1.00                          | 0.18  | 0.36  |
| V                             | 0.05  | -0.22 | 0.25 | 0.22 | 0.14  | 0.13 | 0.08  | 0.07 | 0.39            | 0.07                         | 0.34 | 0.13                         | 0.11  | -0.04 | 0.08  | 0.18                          | 1.00  | 0.00  |

|    |      |      |      |      |      |      |      |      |       |      |       |      |      |      |      |      |      |      |
|----|------|------|------|------|------|------|------|------|-------|------|-------|------|------|------|------|------|------|------|
| Zn | 0.01 | 0.33 | 0.44 | 0.45 | 0.51 | 0.58 | 0.14 | 0.67 | -0.22 | 0.18 | -0.01 | 0.44 | 0.14 | 0.80 | 0.13 | 0.36 | 0.00 | 1.00 |
|----|------|------|------|------|------|------|------|------|-------|------|-------|------|------|------|------|------|------|------|

eTable 4 Correlation matrix of community and seasonally averaged PM<sub>2.5</sub> species

|                               | Al    | As    | Br   | Cr    | EC    | Fe   | K     | Mn    | Na <sup>+</sup> | NO <sub>3</sub> <sup>-</sup> | Ni    | NH <sub>4</sub> <sup>+</sup> | OC    | Pb    | Si    | SO <sub>4</sub> <sup>2-</sup> | V     | Zn    |
|-------------------------------|-------|-------|------|-------|-------|------|-------|-------|-----------------|------------------------------|-------|------------------------------|-------|-------|-------|-------------------------------|-------|-------|
| Al                            | 1.00  | -0.16 | 0.00 | -0.05 | 0.01  | 0.33 | 0.34  | -0.01 | 0.09            | -0.01                        | -0.10 | -0.07                        | 0.05  | -0.17 | 0.93  | -0.09                         | 0.01  | -0.16 |
| As                            | -0.16 | 1.00  | 0.21 | 0.41  | 0.23  | 0.22 | 0.19  | 0.49  | -0.25           | 0.08                         | -0.07 | 0.31                         | 0.28  | 0.53  | -0.09 | 0.38                          | -0.34 | 0.47  |
| Br                            | 0.00  | 0.21  | 1.00 | 0.46  | 0.59  | 0.41 | 0.44  | 0.34  | 0.37            | 0.69                         | 0.07  | 0.68                         | 0.50  | 0.41  | 0.12  | 0.07                          | 0.28  | 0.43  |
| Cr                            | -0.05 | 0.41  | 0.46 | 1.00  | 0.53  | 0.55 | 0.24  | 0.58  | 0.21            | 0.43                         | 0.21  | 0.48                         | 0.32  | 0.60  | 0.07  | 0.16                          | 0.12  | 0.52  |
| EC                            | 0.01  | 0.23  | 0.59 | 0.53  | 1.00  | 0.69 | 0.48  | 0.36  | 0.22            | 0.66                         | 0.24  | 0.54                         | 0.77  | 0.41  | 0.15  | -0.08                         | 0.21  | 0.51  |
| Fe                            | 0.33  | 0.22  | 0.41 | 0.55  | 0.69  | 1.00 | 0.39  | 0.64  | 0.20            | 0.33                         | 0.05  | 0.37                         | 0.34  | 0.52  | 0.49  | 0.12                          | 0.13  | 0.59  |
| K                             | 0.34  | 0.19  | 0.44 | 0.24  | 0.48  | 0.39 | 1.00  | 0.11  | 0.26            | 0.47                         | 0.13  | 0.36                         | 0.75  | 0.11  | 0.38  | -0.09                         | -0.01 | 0.13  |
| Mn                            | -0.01 | 0.49  | 0.34 | 0.58  | 0.36  | 0.64 | 0.11  | 1.00  | -0.04           | 0.07                         | -0.02 | 0.25                         | 0.08  | 0.84  | 0.10  | 0.29                          | -0.08 | 0.68  |
| Na <sup>+</sup>               | 0.09  | -0.25 | 0.37 | 0.21  | 0.22  | 0.20 | 0.26  | -0.04 | 1.00            | 0.44                         | 0.32  | 0.36                         | 0.25  | -0.12 | 0.10  | 0.00                          | 0.52  | -0.10 |
| NO <sub>3</sub> <sup>-</sup>  | -0.01 | 0.08  | 0.69 | 0.43  | 0.66  | 0.33 | 0.47  | 0.07  | 0.44            | 1.00                         | 0.14  | 0.81                         | 0.69  | 0.14  | 0.05  | -0.17                         | 0.26  | 0.25  |
| Ni                            | -0.10 | -0.07 | 0.07 | 0.21  | 0.24  | 0.05 | 0.13  | -0.02 | 0.32            | 0.14                         | 1.00  | 0.04                         | 0.29  | 0.02  | -0.14 | -0.11                         | 0.36  | 0.01  |
| NH <sub>4</sub> <sup>+</sup>  | -0.07 | 0.31  | 0.68 | 0.48  | 0.54  | 0.37 | 0.36  | 0.25  | 0.36            | 0.81                         | 0.04  | 1.00                         | 0.54  | 0.33  | 0.02  | 0.44                          | 0.25  | 0.37  |
| OC                            | 0.05  | 0.28  | 0.50 | 0.32  | 0.77  | 0.34 | 0.75  | 0.08  | 0.25            | 0.69                         | 0.29  | 0.54                         | 1.00  | 0.18  | 0.12  | -0.11                         | 0.05  | 0.19  |
| Pb                            | -0.17 | 0.53  | 0.41 | 0.60  | 0.41  | 0.52 | 0.11  | 0.84  | -0.12           | 0.14                         | 0.02  | 0.33                         | 0.18  | 1.00  | -0.06 | 0.32                          | -0.14 | 0.78  |
| Si                            | 0.93  | -0.09 | 0.12 | 0.07  | 0.15  | 0.49 | 0.38  | 0.10  | 0.10            | 0.05                         | -0.14 | 0.02                         | 0.12  | -0.06 | 1.00  | -0.02                         | 0.01  | -0.05 |
| SO <sub>4</sub> <sup>2-</sup> | -0.09 | 0.38  | 0.07 | 0.16  | -0.08 | 0.12 | -0.09 | 0.29  | 0.00            | -0.17                        | -0.11 | 0.44                         | -0.11 | 0.32  | -0.02 | 1.00                          | 0.04  | 0.20  |

|    |       |       |      |      |      |      |       |       |       |      |      |      |      |       |       |      |       |       |
|----|-------|-------|------|------|------|------|-------|-------|-------|------|------|------|------|-------|-------|------|-------|-------|
| V  | 0.01  | -0.34 | 0.28 | 0.12 | 0.21 | 0.13 | -0.01 | -0.08 | 0.52  | 0.26 | 0.36 | 0.25 | 0.05 | -0.14 | 0.01  | 0.04 | 1.00  | -0.04 |
| Zn | -0.16 | 0.47  | 0.43 | 0.52 | 0.51 | 0.59 | 0.13  | 0.68  | -0.10 | 0.25 | 0.01 | 0.37 | 0.19 | 0.78  | -0.05 | 0.20 | -0.04 | 1.00  |

eTable 5 Community-specific coefficients of variation for species ratios

| Community    | Al   | As   | Br   | Cr   | EC   | Fe   | K    | Mn   | Na <sup>+</sup> | NO <sub>3</sub> <sup>-</sup> | Ni   | NH <sub>4</sub> <sup>+</sup> | OC   | Pb   | Si   | SO <sub>4</sub> <sup>2-</sup> | V    | Zn   |
|--------------|------|------|------|------|------|------|------|------|-----------------|------------------------------|------|------------------------------|------|------|------|-------------------------------|------|------|
| Seattle      | 2.87 | 0.96 | 0.50 | 1.06 | 0.37 | 0.52 | 1.79 | 1.20 | 0.88            | 0.40                         | 1.19 | 0.47                         | 0.26 | 0.73 | 1.04 | 0.47                          | 1.13 | 0.50 |
| Sacramento   | 1.86 | 1.62 | 0.77 | 1.54 | 0.58 | 0.65 | 3.49 | 0.98 | 1.29            | 0.65                         | 2.86 | 0.63                         | 0.63 | 1.29 | 0.91 | 0.66                          | 1.25 | 1.25 |
| Fresno       | 1.49 | 1.65 | 0.61 | 1.45 | 0.42 | 0.7  | 1.58 | 0.99 | 0.96            | 0.49                         | 2.39 | 0.45                         | 0.38 | 0.86 | 1.01 | 0.62                          | 1.48 | 0.89 |
| Bakersfield  | 1.30 | 1.11 | 0.48 | 1.67 | 0.41 | 0.74 | 1.73 | 1.05 | 0.93            | 0.56                         | 1.41 | 0.43                         | 0.33 | 1.06 | 0.97 | 0.53                          | 1.43 | 1.20 |
| LA           | 1.84 | 1.31 | 0.45 | 1.75 | 0.47 | 0.95 | 0.66 | 0.94 | 0.89            | 0.48                         | 0.88 | 0.56                         | 0.38 | 0.86 | 1.41 | 0.57                          | 0.63 | 0.65 |
| Riverside    | 1.42 | 1.32 | 0.47 | 1.86 | 0.67 | 0.76 | 1.90 | 1.03 | 0.83            | 0.31                         | 0.94 | 0.37                         | 0.43 | 1.11 | 1.01 | 0.47                          | 0.66 | 1.58 |
| San Diego    | 1.82 | 1.39 | 0.55 | 1.84 | 0.54 | 0.66 | 0.67 | 1.11 | 0.75            | 0.43                         | 1.01 | 0.53                         | 0.55 | 0.95 | 0.97 | 0.54                          | 0.68 | 0.67 |
| El Paso      | 1.21 | 1.72 | 0.91 | 2.20 | 0.48 | 0.5  | 0.57 | 1.52 | 0.63            | 0.92                         | 2.31 | 0.64                         | 0.34 | 0.87 | 0.84 | 0.60                          | 1.14 | 0.94 |
| Dallas       | 2.42 | 1.41 | 0.51 | 1.55 | 0.67 | 0.73 | 0.68 | 1.00 | 1.04            | 0.82                         | 1.35 | 0.36                         | 0.35 | 2.09 | 1.20 | 0.38                          | 1.09 | 0.65 |
| Houston      | 2.57 | 1.15 | 0.52 | 1.48 | 0.63 | 1.06 | 0.56 | 1.01 | 1.02            | 0.79                         | 1.20 | 0.40                         | 0.59 | 1.06 | 1.31 | 0.34                          | 0.72 | 1.33 |
| Beaumont     | 2.30 | 1.51 | 0.72 | 1.82 | 0.58 | 1.23 | 0.84 | 1.16 | 1.20            | 0.70                         | 0.92 | 0.46                         | 0.62 | 1.51 | 1.44 | 0.39                          | 0.86 | 1.40 |
| KansasCity   | 1.71 | 1.08 | 0.87 | 5.23 | 0.78 | 0.74 | 0.69 | 0.91 | 1.10            | 0.73                         | 3.38 | 0.40                         | 0.84 | 0.75 | 1.07 | 0.43                          | 1.32 | 0.93 |
| Minneap      | 1.83 | 1.28 | 0.84 | 4.67 | 0.57 | 0.87 | 1.58 | 1.04 | 1.18            | 0.76                         | 2.49 | 0.56                         | 0.55 | 1.22 | 1.08 | 0.58                          | 2.26 | 0.98 |
| St Louis     | 2.85 | 1.23 | 1.43 | 1.78 | 0.51 | 0.9  | 1.24 | 1.43 | 1.09            | 0.76                         | 2.05 | 0.35                         | 0.48 | 1.03 | 1.33 | 0.36                          | 1.70 | 1.19 |
| Dayton       | 2.32 | 1.11 | 0.72 | 1.11 | 0.48 | 0.63 | 0.49 | 0.91 | 1.39            | 0.73                         | 1.29 | 0.34                         | 0.38 | 0.92 | 0.97 | 0.35                          | 1.60 | 0.82 |
| Toledo       | 2.75 | 1.04 | 0.81 | 0.97 | 0.51 | 0.56 | 0.84 | 1.06 | 0.93            | 0.65                         | 1.22 | 0.34                         | 0.52 | 0.87 | 0.76 | 0.38                          | 1.40 | 0.55 |
| Detroit      | 1.93 | 1.22 | 0.67 | 1.60 | 0.64 | 0.79 | 1.52 | 0.93 | 1.28            | 0.64                         | 1.95 | 0.39                         | 0.53 | 1.02 | 0.75 | 0.37                          | 1.15 | 1.05 |
| Columbus     | 1.78 | 1.23 | 0.90 | 1.34 | 0.56 | 0.6  | 0.66 | 0.86 | 0.85            | 0.70                         | 1.59 | 0.37                         | 0.49 | 1.15 | 0.92 | 0.42                          | 1.33 | 0.90 |
| Cleveland    | 1.85 | 1.21 | 0.57 | 1.09 | 0.61 | 0.88 | 0.85 | 1.17 | 1.04            | 0.94                         | 1.23 | 0.47                         | 0.50 | 0.90 | 0.72 | 0.36                          | 1.18 | 1.03 |
| Akron        | 1.62 | 1.02 | 0.67 | 1.11 | 0.42 | 0.64 | 0.54 | 1.09 | 1.09            | 0.73                         | 1.27 | 0.27                         | 0.41 | 0.84 | 0.63 | 0.30                          | 1.27 | 0.57 |
| Erie         | 5.66 | 1.18 | 3.38 | 2.31 | 2.57 | 4.85 | 4.26 | 3.96 | 2.55            | 3.39                         | 2.63 | 2.77                         | 2.74 | 3.35 | 5.64 | 2.65                          | 4.60 | 3.71 |
| Pittsburgh   | 3.49 | 1.07 | 0.65 | 1.50 | 0.48 | 0.59 | 0.72 | 1.14 | 0.85            | 0.86                         | 1.20 | 0.28                         | 0.48 | 0.91 | 8.80 | 0.28                          | 1.24 | 0.76 |
| Harrisburg   | 3.07 | 1.22 | 0.98 | 0.90 | 0.49 | 0.74 | 0.73 | 1.35 | 1.07            | 0.65                         | 1.90 | 0.29                         | 0.39 | 1.15 | 1.92 | 0.33                          | 1.57 | 1.40 |
| Philadelphia | 2.25 | 1.17 | 0.71 | 1.15 | 0.53 | 0.56 | 1.00 | 0.98 | 1.26            | 0.71                         | 1.53 | 0.48                         | 0.50 | 0.85 | 0.81 | 0.39                          | 0.78 | 0.75 |
| Boston       | 1.89 | 1.03 | 0.65 | 2.55 | 0.53 | 0.56 | 0.73 | 0.92 | 1.05            | 0.65                         | 0.78 | 0.47                         | 0.42 | 0.83 | 0.96 | 0.40                          | 0.75 | 1.75 |

eTable 6 Community- and season-specific coefficients of variation

| Community   |    | Al   | As   | Br   | Cr   | EC   | Fe   | K    | Mn   | Na <sup>+</sup> | NO <sub>3</sub> <sup>-</sup> | Ni   | NH <sub>4</sub> <sup>+</sup> | OC   | Pb   | Si   | SO <sub>4</sub> <sup>2-</sup> | V    | Zn   |
|-------------|----|------|------|------|------|------|------|------|------|-----------------|------------------------------|------|------------------------------|------|------|------|-------------------------------|------|------|
| Seattle     | W  | 3.87 | 0.75 | 0.52 | 1.16 | 0.34 | 0.57 | 0.63 | 1.34 | 1.18            | 0.42                         | 1.31 | 0.50                         | 0.21 | 0.72 | 0.61 | 0.34                          | 0.96 | 0.54 |
| Seattle     | Sp | 2.03 | 1.05 | 0.47 | 0.87 | 0.35 | 0.43 | 0.37 | 1.23 | 0.8             | 0.33                         | 1.25 | 0.33                         | 0.28 | 0.61 | 1.02 | 0.28                          | 1.05 | 0.53 |
| Seattle     | Su | 2.66 | 1.17 | 0.47 | 0.98 | 0.42 | 0.49 | 2.49 | 1.15 | 0.62            | 0.37                         | 0.96 | 0.30                         | 0.27 | 0.96 | 0.52 | 0.23                          | 0.86 | 0.52 |
| Seattle     | F  | 3.03 | 0.82 | 0.43 | 1.23 | 0.38 | 0.50 | 0.35 | 0.97 | 0.97            | 0.43                         | 1.05 | 0.52                         | 0.24 | 0.52 | 0.78 | 0.47                          | 1.11 | 0.4  |
| Sacramento  | W  | 1.67 | 1.95 | 0.83 | 1.31 | 0.72 | 0.55 | 0.53 | 1.26 | 1.95            | 0.47                         | 3.91 | 0.59                         | 0.60 | 0.95 | 0.70 | 0.95                          | 1.51 | 1.15 |
| Sacramento  | Sp | 1.41 | 1.35 | 0.87 | 1.27 | 0.49 | 0.58 | 0.62 | 0.85 | 1.47            | 0.54                         | 2.39 | 0.69                         | 0.84 | 0.93 | 0.86 | 0.48                          | 1.51 | 1.42 |
| Sacramento  | Su | 2.04 | 1.72 | 0.64 | 1.66 | 0.46 | 0.56 | 4.32 | 0.92 | 0.79            | 0.52                         | 2.49 | 0.54                         | 0.48 | 1.55 | 0.64 | 0.45                          | 0.98 | 1.69 |
| Sacramento  | F  | 1.18 | 1.35 | 0.66 | 1.76 | 0.44 | 0.64 | 0.56 | 0.96 | 1.14            | 0.66                         | 1.93 | 0.68                         | 0.42 | 1.15 | 0.81 | 0.70                          | 1.13 | 0.75 |
| Fresno      | W  | 1.43 | 1.77 | 0.59 | 1.29 | 0.37 | 0.51 | 0.39 | 1.12 | 0.99            | 0.39                         | 3.92 | 0.46                         | 0.37 | 0.82 | 1.13 | 0.59                          | 1.7  | 0.5  |
| Fresno      | Sp | 1.23 | 1.05 | 0.54 | 1.08 | 0.40 | 0.51 | 0.45 | 0.76 | 0.76            | 0.41                         | 1.93 | 0.45                         | 0.30 | 0.79 | 0.89 | 0.39                          | 1.38 | 0.71 |
| Fresno      | Su | 0.95 | 2.33 | 0.46 | 1.37 | 0.32 | 0.33 | 2.09 | 0.76 | 0.68            | 0.38                         | 1.28 | 0.31                         | 0.29 | 0.93 | 0.41 | 0.23                          | 1.13 | 1.56 |
| Fresno      | F  | 1.56 | 1.25 | 0.59 | 1.22 | 0.53 | 0.84 | 0.61 | 1.19 | 1.46            | 0.41                         | 1.97 | 0.44                         | 0.53 | 0.74 | 1.09 | 0.6                           | 1.32 | 0.76 |
| Bakersfield | W  | 2.86 | 1.15 | 0.64 | 1.75 | 0.43 | 1.28 | 0.72 | 1.05 | 0.98            | 0.28                         | 1.52 | 0.32                         | 0.37 | 1.19 | 2.50 | 0.43                          | 1.74 | 1.44 |
| Bakersfield | Sp | 1.50 | 1.03 | 0.44 | 0.90 | 0.38 | 0.73 | 0.59 | 1.04 | 0.86            | 0.40                         | 1.25 | 0.31                         | 0.31 | 0.75 | 1.06 | 0.40                          | 1.48 | 0.58 |
| Bakersfield | Su | 0.64 | 1.04 | 0.33 | 1.20 | 0.31 | 0.34 | 1.98 | 0.67 | 0.79            | 0.51                         | 1.17 | 0.34                         | 0.24 | 1.18 | 0.39 | 0.25                          | 1.13 | 1.41 |
| Bakersfield | F  | 1.15 | 1.11 | 0.41 | 1.89 | 0.44 | 0.68 | 0.62 | 1.02 | 0.98            | 0.53                         | 1.58 | 0.46                         | 0.34 | 0.88 | 0.84 | 0.46                          | 1.47 | 0.95 |
| LA          | W  | 1.47 | 0.97 | 0.51 | 1.77 | 0.36 | 0.63 | 0.71 | 1.14 | 0.82            | 0.48                         | 1.08 | 0.55                         | 0.27 | 0.85 | 1.13 | 0.49                          | 1.17 | 0.48 |
| LA          | Sp | 1.37 | 1.10 | 0.59 | 1.40 | 0.38 | 1.15 | 0.57 | 0.87 | 0.72            | 0.67                         | 0.86 | 0.76                         | 0.12 | 1.13 | 1.24 | 0.37                          | 0.57 | 0.66 |
| LA          | Su | 1.44 | 1.08 | 0.32 | 0.71 | 0.45 | 0.59 | 0.59 | 0.68 | 0.71            | 0.24                         | 0.55 | 0.27                         | 0.39 | 0.70 | 0.43 | 0.22                          | 0.29 | 0.62 |
| LA          | F  | 1.07 | 1.45 | 0.35 | 0.72 | 0.41 | 0.53 | 0.41 | 0.75 | 0.8             | 0.40                         | 0.96 | 0.5                          | 0.42 | 0.80 | 0.58 | 0.53                          | 0.59 | 0.69 |
| Riverside   | W  | 1.53 | 1.21 | 0.57 | 1.49 | 0.51 | 0.75 | 0.53 | 1.05 | 0.84            | 0.38                         | 1.23 | 0.47                         | 0.39 | 0.90 | 1.19 | 0.53                          | 0.72 | 1.21 |
| Riverside   | Sp | 1.22 | 1.52 | 0.47 | 1.43 | 0.58 | 0.67 | 0.61 | 0.76 | 0.89            | 0.34                         | 0.88 | 0.35                         | 0.39 | 1.19 | 0.96 | 0.33                          | 0.69 | 1.79 |
| Riverside   | Su | 1.42 | 1.38 | 0.43 | 2.24 | 0.61 | 0.65 | 2.61 | 0.74 | 0.59            | 0.17                         | 0.85 | 0.2                          | 0.41 | 1.08 | 0.71 | 0.21                          | 0.50 | 1.32 |
| Riverside   | F  | 1.40 | 1.22 | 0.40 | 1.31 | 0.64 | 0.75 | 0.78 | 1.00 | 0.81            | 0.31                         | 0.65 | 0.36                         | 0.42 | 0.85 | 0.97 | 0.43                          | 0.60 | 1.09 |
| San Diego   | W  | 1.67 | 1.16 | 0.51 | 1.84 | 0.44 | 0.85 | 0.47 | 1.06 | 0.81            | 0.38                         | 1.17 | 0.48                         | 0.4  | 0.62 | 1.15 | 0.73                          | 0.77 | 0.64 |
| San Diego   | Sp | 1.58 | 1.40 | 0.66 | 1.49 | 0.47 | 0.56 | 0.46 | 0.93 | 0.63            | 0.41                         | 1.29 | 0.59                         | 0.66 | 1.20 | 0.95 | 0.42                          | 0.79 | 0.76 |
| San Diego   | Su | 1.49 | 1.43 | 0.48 | 1.72 | 0.34 | 0.39 | 1.00 | 1.06 | 0.50            | 0.32                         | 0.77 | 0.34                         | 0.42 | 1.08 | 0.43 | 0.25                          | 0.59 | 0.67 |
| San Diego   | F  | 2.02 | 1.33 | 0.52 | 1.94 | 0.43 | 0.53 | 0.56 | 1.18 | 0.80            | 0.54                         | 0.73 | 0.59                         | 0.4  | 0.91 | 0.89 | 0.52                          | 0.53 | 0.42 |
| El Paso     | W  | 1.64 | 2.23 | 1.13 | 3.31 | 0.37 | 0.47 | 0.49 | 1.39 | 0.70            | 0.58                         | 3.05 | 0.83                         | 0.35 | 0.83 | 0.96 | 0.78                          | 1.13 | 0.94 |
| El Paso     | Sp | 0.83 | 1.34 | 1.00 | 1.26 | 0.47 | 0.36 | 0.47 | 1.64 | 0.47            | 0.70                         | 1.69 | 0.63                         | 0.38 | 0.80 | 0.56 | 0.54                          | 1.17 | 0.97 |



|            |    |      |      |      |      |      |      |      |      |      |      |      |      |      |      |      |      |      |      |
|------------|----|------|------|------|------|------|------|------|------|------|------|------|------|------|------|------|------|------|------|
| El Paso    | Su | 0.91 | 1.12 | 0.35 | 1.45 | 0.43 | 0.56 | 0.62 | 1.58 | 0.62 | 0.64 | 1.24 | 0.43 | 0.29 | 0.79 | 0.76 | 0.40 | 1.12 | 0.97 |
| El Paso    | F  | 1.43 | 0.98 | 0.52 | 2.04 | 0.46 | 0.44 | 0.51 | 1.40 | 0.59 | 0.92 | 1.24 | 0.69 | 0.28 | 0.87 | 0.73 | 0.64 | 0.87 | 0.89 |
| Dallas     | W  | 2.93 | 1.81 | 0.41 | 1.02 | 0.60 | 0.68 | 0.53 | 1.02 | 1.01 | 0.42 | 1.09 | 0.43 | 0.40 | 2.51 | 0.89 | 0.48 | 1.17 | 0.52 |
| Dallas     | Sp | 1.72 | 0.97 | 0.40 | 2.13 | 0.66 | 0.69 | 0.51 | 0.99 | 1.08 | 0.7  | 1.53 | 0.32 | 0.33 | 0.92 | 0.91 | 0.33 | 0.97 | 0.61 |
| Dallas     | Su | 1.67 | 1.03 | 0.51 | 1.38 | 0.48 | 0.73 | 1.05 | 0.95 | 0.85 | 0.52 | 1.08 | 0.31 | 0.29 | 0.93 | 1.01 | 0.26 | 0.93 | 0.77 |
| Dallas     | F  | 2.03 | 0.82 | 0.57 | 1.18 | 0.70 | 0.71 | 0.41 | 0.98 | 0.87 | 0.75 | 1.36 | 0.38 | 0.32 | 1.04 | 0.74 | 0.38 | 1.29 | 0.63 |
| Houston    | W  | 3.12 | 0.81 | 0.47 | 1.31 | 0.53 | 0.75 | 0.55 | 0.81 | 1.06 | 0.62 | 1    | 0.42 | 0.5  | 1.23 | 1.02 | 0.43 | 0.76 | 0.76 |
| Houston    | Sp | 1.57 | 0.96 | 0.45 | 1.18 | 0.57 | 0.63 | 0.56 | 0.89 | 1.08 | 0.67 | 0.86 | 0.35 | 0.53 | 0.83 | 0.71 | 0.28 | 0.68 | 0.85 |
| Houston    | Su | 1.54 | 1.30 | 0.42 | 1.59 | 0.48 | 0.81 | 0.56 | 0.86 | 0.81 | 0.39 | 1.88 | 0.46 | 0.48 | 0.84 | 0.9  | 0.32 | 0.63 | 1.03 |
| Houston    | F  | 2.47 | 1.06 | 0.46 | 1.65 | 0.72 | 1.02 | 0.48 | 1.18 | 1.03 | 0.49 | 0.89 | 0.34 | 0.65 | 0.91 | 0.97 | 0.33 | 0.65 | 1.7  |
| Beaumont   | W  | 2.12 | 1.28 | 0.70 | 2.10 | 0.50 | 0.64 | 1.03 | 1.25 | 1.39 | 0.64 | 0.92 | 0.46 | 0.64 | 0.96 | 0.87 | 0.42 | 0.94 | 1.22 |
| Beaumont   | Sp | 1.80 | 1.51 | 0.59 | 1.07 | 0.65 | 0.74 | 0.55 | 1.14 | 1.17 | 0.57 | 0.73 | 0.39 | 0.57 | 1.43 | 0.81 | 0.26 | 0.74 | 1.39 |
| Beaumont   | Su | 1.36 | 1.36 | 0.57 | 1.80 | 0.66 | 0.88 | 0.87 | 1.11 | 0.98 | 0.67 | 0.82 | 0.45 | 0.55 | 2.03 | 0.95 | 0.36 | 0.66 | 1.49 |
| Beaumont   | F  | 2.20 | 0.98 | 0.72 | 1.56 | 0.48 | 0.91 | 0.76 | 1.12 | 1.33 | 0.53 | 1.21 | 0.52 | 0.6  | 1.55 | 1.25 | 0.50 | 1.02 | 1.38 |
| KansasCity | W  | 1.68 | 1.22 | 0.55 | 5.53 | 0.72 | 0.85 | 0.59 | 0.89 | 1.09 | 0.28 | 4.06 | 0.25 | 0.79 | 0.74 | 0.73 | 0.37 | 1.31 | 0.82 |
| KansasCity | Sp | 1.31 | 1.00 | 0.59 | 1.91 | 0.62 | 0.54 | 0.54 | 0.80 | 1.11 | 0.6  | 1.65 | 0.38 | 1.11 | 0.69 | 1.27 | 0.38 | 1.37 | 1.03 |
| KansasCity | Su | 1.73 | 1.18 | 0.59 | 2.54 | 1.05 | 0.69 | 0.90 | 0.84 | 1.03 | 0.5  | 1.58 | 0.41 | 0.66 | 0.69 | 0.83 | 0.35 | 1.3  | 0.5  |
| KansasCity | F  | 1.44 | 0.95 | 1.30 | 1.57 | 0.68 | 0.83 | 0.65 | 0.99 | 1.08 | 0.75 | 1.54 | 0.44 | 0.81 | 0.83 | 0.76 | 0.41 | 1.25 | 1.01 |
| Minneap    | W  | 1.74 | 1.37 | 0.87 | 5.46 | 0.53 | 1.38 | 0.55 | 1.05 | 1.11 | 0.37 | 1.85 | 0.37 | 0.48 | 1.36 | 1.17 | 0.78 | 1.53 | 1.16 |
| Minneap    | Sp | 1.36 | 1.14 | 0.74 | 1.53 | 0.49 | 0.65 | 0.55 | 1.01 | 0.87 | 0.58 | 1.84 | 0.43 | 0.6  | 0.9  | 1.09 | 0.52 | 2.4  | 0.98 |
| Minneap    | Su | 2.24 | 1.46 | 0.80 | 3.84 | 0.56 | 0.76 | 1.87 | 0.85 | 1.07 | 0.7  | 3.46 | 0.54 | 0.54 | 1.42 | 0.88 | 0.40 | 1.45 | 0.95 |
| Minneap    | F  | 1.50 | 1.14 | 0.95 | 1.23 | 0.60 | 0.79 | 0.56 | 1.18 | 1.41 | 0.69 | 1.23 | 0.57 | 0.56 | 0.93 | 1.07 | 0.44 | 1.51 | 0.78 |
| St Louis   | W  | 2.22 | 1.00 | 0.74 | 1.86 | 0.50 | 0.99 | 0.41 | 1.42 | 1.22 | 0.29 | 1.6  | 0.25 | 0.75 | 0.84 | 0.83 | 0.36 | 1.49 | 0.92 |
| St Louis   | Sp | 1.61 | 1.56 | 0.98 | 1.65 | 0.48 | 0.94 | 0.51 | 1.48 | 0.87 | 0.61 | 2.14 | 0.32 | 0.43 | 1.23 | 1.13 | 0.28 | 1.46 | 1.62 |
| St Louis   | Su | 3.34 | 1.16 | 1.87 | 1.59 | 0.44 | 0.81 | 1.80 | 1.43 | 1.04 | 0.65 | 1.38 | 0.33 | 0.32 | 1.03 | 1.42 | 0.25 | 2.14 | 0.84 |
| St Louis   | F  | 1.49 | 1.03 | 1.84 | 1.71 | 0.52 | 0.86 | 0.50 | 1.31 | 1.31 | 0.76 | 1.81 | 0.39 | 0.4  | 0.98 | 0.56 | 0.37 | 1.24 | 0.98 |
| Dayton     | W  | 1.20 | 1.02 | 0.71 | 0.76 | 0.45 | 0.53 | 0.39 | 0.85 | 1.20 | 0.34 | 1.38 | 0.28 | 0.43 | 0.94 | 0.65 | 0.41 | 1.72 | 0.65 |
| Dayton     | Sp | 1.91 | 1.00 | 0.48 | 1.28 | 0.40 | 0.53 | 0.38 | 0.80 | 0.79 | 0.57 | 1.45 | 0.26 | 0.42 | 0.82 | 0.60 | 0.24 | 1.39 | 0.8  |
| Dayton     | Su | 2.45 | 1.31 | 0.67 | 0.95 | 0.50 | 0.71 | 0.60 | 0.83 | 0.83 | 0.94 | 1.18 | 0.32 | 0.36 | 0.89 | 1.23 | 0.26 | 1.96 | 0.91 |
| Dayton     | F  | 1.46 | 1.01 | 0.67 | 1.00 | 0.46 | 0.67 | 0.50 | 0.82 | 0.82 | 0.69 | 1.17 | 0.38 | 0.34 | 0.88 | 0.56 | 0.38 | 1.27 | 0.73 |
| Toledo     | W  | 1.47 | 1.22 | 1.02 | 1.09 | 0.66 | 0.48 | 0.24 | 1.09 | 0.88 | 0.36 | 1.17 | 0.25 | 0.69 | 0.93 | 0.54 | 0.49 | 1.87 | 0.58 |
| Toledo     | Sp | 2.48 | 0.94 | 0.67 | 0.86 | 0.43 | 0.6  | 0.57 | 1.11 | 0.84 | 0.37 | 1.5  | 0.21 | 0.79 | 0.79 | 0.78 | 0.21 | 1.66 | 0.45 |
| Toledo     | Su | 1.75 | 1.15 | 0.62 | 0.89 | 0.40 | 0.45 | 1.26 | 1.18 | 0.89 | 0.71 | 0.84 | 0.45 | 0.31 | 1.08 | 0.63 | 0.39 | 0.93 | 0.55 |
| Toledo     | F  | 1.70 | 0.84 | 0.90 | 0.87 | 0.50 | 0.52 | 0.44 | 0.92 | 1.02 | 0.78 | 1.24 | 0.41 | 0.39 | 0.77 | 0.53 | 0.31 | 0.98 | 0.54 |
| Detroit    | W  | 1.39 | 1.66 | 0.67 | 1.37 | 0.69 | 0.76 | 0.52 | 1.01 | 1.13 | 0.32 | 1.12 | 0.27 | 0.52 | 0.91 | 0.54 | 0.37 | 1.46 | 0.59 |
| Detroit    | Sp | 1.52 | 1.15 | 0.62 | 1.11 | 0.71 | 0.83 | 0.52 | 0.81 | 0.95 | 0.46 | 1.34 | 0.29 | 0.63 | 0.82 | 0.66 | 0.27 | 1.03 | 1.06 |

|            |    |      |      |      |      |      |      |      |      |      |      |      |      |      |      |      |      |      |      |
|------------|----|------|------|------|------|------|------|------|------|------|------|------|------|------|------|------|------|------|------|
| Detroit    | Su | 1.97 | 1.06 | 0.70 | 2.35 | 0.52 | 0.77 | 1.87 | 0.94 | 1.15 | 0.75 | 2.74 | 0.49 | 0.44 | 0.86 | 0.78 | 0.39 | 1.07 | 1.26 |
| Detroit    | F  | 1.32 | 1.08 | 0.65 | 1.24 | 0.61 | 0.74 | 0.51 | 0.99 | 1.51 | 0.57 | 1.87 | 0.43 | 0.52 | 1.26 | 0.55 | 0.37 | 1.15 | 0.85 |
| Columbus   | W  | 1.63 | 1.02 | 0.79 | 1.01 | 0.45 | 0.58 | 0.98 | 0.72 | 0.67 | 0.32 | 0.94 | 0.27 | 0.52 | 0.89 | 0.5  | 0.43 | 1.36 | 0.52 |
| Columbus   | Sp | 1.56 | 1.30 | 0.83 | 1.01 | 0.45 | 0.36 | 0.52 | 0.84 | 0.72 | 0.56 | 1.2  | 0.38 | 0.7  | 1.22 | 0.62 | 0.50 | 1.27 | 0.65 |
| Columbus   | Su | 1.87 | 1.56 | 0.81 | 1.92 | 0.69 | 0.61 | 0.53 | 1    | 1.01 | 0.87 | 1.74 | 0.45 | 0.48 | 1.16 | 1    | 0.4  | 1.22 | 0.63 |
| Columbus   | F  | 1.54 | 0.95 | 0.77 | 0.76 | 0.54 | 0.71 | 0.27 | 0.81 | 0.91 | 0.63 | 1.15 | 0.34 | 0.4  | 1.05 | 0.93 | 0.28 | 1.08 | 1.07 |
| Cleveland  | W  | 1.75 | 1.19 | 0.56 | 1.13 | 0.59 | 0.63 | 0.71 | 0.84 | 0.84 | 0.29 | 1.14 | 0.17 | 0.39 | 0.66 | 0.67 | 0.38 | 1.21 | 0.93 |
| Cleveland  | Sp | 1.64 | 1.06 | 0.52 | 1.15 | 0.63 | 1.13 | 0.79 | 1.51 | 1.08 | 1.03 | 0.95 | 0.64 | 0.61 | 1.01 | 0.71 | 0.42 | 1.03 | 1.22 |
| Cleveland  | Su | 1.95 | 1.26 | 0.66 | 0.85 | 0.67 | 0.76 | 1.09 | 0.84 | 1.16 | 0.78 | 1.66 | 0.3  | 0.5  | 0.95 | 0.79 | 0.28 | 1.21 | 1.15 |
| Cleveland  | F  | 1.44 | 1.17 | 0.48 | 1.09 | 0.51 | 0.65 | 0.69 | 0.79 | 0.87 | 0.66 | 1.17 | 0.31 | 0.35 | 0.8  | 0.6  | 0.27 | 1.26 | 0.75 |
| Akron      | W  | 1.54 | 1.23 | 0.72 | 1.19 | 0.45 | 0.45 | 0.34 | 0.75 | 0.93 | 0.44 | 1.38 | 0.27 | 0.52 | 0.94 | 0.52 | 0.35 | 0.84 | 0.49 |
| Akron      | Sp | 1.45 | 1.03 | 0.64 | 1.05 | 0.40 | 0.41 | 0.41 | 0.76 | 0.87 | 0.51 | 1.01 | 0.22 | 0.46 | 0.96 | 0.58 | 0.23 | 1.45 | 0.49 |
| Akron      | Su | 1.54 | 1.07 | 0.59 | 0.94 | 0.42 | 0.63 | 0.88 | 1.27 | 0.98 | 0.61 | 1.21 | 0.32 | 0.41 | 0.73 | 0.69 | 0.31 | 1.12 | 0.65 |
| Akron      | F  | 1.89 | 0.8  | 0.49 | 0.93 | 0.32 | 0.79 | 0.35 | 1.27 | 0.7  | 0.6  | 1.5  | 0.19 | 0.25 | 0.64 | 0.42 | 0.23 | 1.41 | 0.52 |
| Erie       | W  | 0.81 | 1.09 | 0.54 | 0.57 | 0.43 | 0.46 | 0.32 | 1.12 | 0.55 | 0.43 | 0.92 | 0.26 | 0.31 | 0.78 | 0.35 | 0.25 | 0.9  | 0.59 |
| Erie       | Sp | 3.59 | 1.16 | 2.88 | 2.47 | 2.64 | 3.45 | 3.34 | 3.36 | 2.64 | 2.7  | 2.49 | 2.55 | 2.39 | 2.78 | 3.59 | 2.54 | 3.53 | 3.25 |
| Erie       | Su | 1.95 | 1.37 | 0.69 | 0.66 | 0.63 | 0.76 | 0.67 | 1.28 | 0.87 | 0.73 | 0.94 | 0.26 | 0.5  | 0.8  | 0.85 | 0.21 | 1.18 | 0.56 |
| Erie       | F  | 1.79 | 0.73 | 0.68 | 0.77 | 0.49 | 0.89 | 0.56 | 1.27 | 0.83 | 0.93 | 1.16 | 0.29 | 0.47 | 1.65 | 0.58 | 0.34 | 1.02 | 0.98 |
| Pittsburgh | W  | 1.63 | 1.28 | 0.42 | 1.17 | 0.44 | 0.63 | 0.36 | 1.14 | 0.69 | 0.33 | 0.78 | 0.2  | 0.36 | 0.54 | 0.43 | 0.27 | 1.27 | 0.62 |
| Pittsburgh | Sp | 1.49 | 1.18 | 0.51 | 1.15 | 0.44 | 0.5  | 0.4  | 0.97 | 0.76 | 0.68 | 1.18 | 0.28 | 0.93 | 1.03 | 0.54 | 0.24 | 1.11 | 0.73 |
| Pittsburgh | Su | 3.94 | 1.01 | 0.49 | 0.90 | 0.45 | 0.54 | 1.14 | 0.79 | 0.99 | 0.61 | 0.94 | 0.22 | 0.39 | 0.93 | 7.53 | 0.22 | 1.58 | 0.68 |
| Pittsburgh | F  | 2.06 | 0.84 | 0.73 | 1.66 | 0.42 | 0.6  | 0.64 | 1.29 | 0.76 | 0.77 | 1.51 | 0.34 | 0.36 | 0.83 | 0.74 | 0.26 | 0.94 | 0.7  |
| Harrisburg | W  | 1.91 | 1.21 | 0.78 | 0.75 | 0.49 | 0.5  | 0.4  | 1.09 | 0.83 | 0.32 | 1.48 | 0.23 | 0.51 | 0.61 | 0.7  | 0.34 | 1.59 | 0.55 |
| Harrisburg | Sp | 2.56 | 1.24 | 0.89 | 0.96 | 0.38 | 0.91 | 0.9  | 1.19 | 1.08 | 0.47 | 2    | 0.22 | 0.33 | 1.2  | 1.73 | 0.29 | 0.68 | 1.17 |
| Harrisburg | Su | 2.26 | 1.18 | 0.71 | 0.83 | 0.63 | 0.54 | 0.48 | 1.37 | 1.06 | 0.86 | 0.94 | 0.35 | 0.44 | 1.36 | 0.72 | 0.28 | 1.26 | 1.98 |
| Harrisburg | F  | 2.16 | 1.18 | 0.95 | 0.89 | 0.38 | 0.49 | 0.38 | 1.32 | 1.07 | 0.57 | 0.91 | 0.19 | 0.31 | 0.9  | 0.52 | 0.3  | 0.72 | 1.66 |
| Philadelph | W  | 1.92 | 1.24 | 0.74 | 1.13 | 0.59 | 0.77 | 1.24 | 0.89 | 1.18 | 0.57 | 1.44 | 0.61 | 0.63 | 0.7  | 0.51 | 0.53 | 0.85 | 0.67 |
| Philadelph | Sp | 2.63 | 1.13 | 0.57 | 0.99 | 0.44 | 0.48 | 0.75 | 0.88 | 0.93 | 0.5  | 0.72 | 0.33 | 0.39 | 0.75 | 0.75 | 0.28 | 0.72 | 0.68 |
| Philadelph | Su | 1.89 | 1.33 | 0.63 | 1.31 | 0.53 | 0.49 | 1.42 | 1.31 | 1.2  | 0.71 | 0.65 | 0.39 | 0.45 | 0.86 | 0.87 | 0.32 | 0.79 | 0.91 |
| Philadelph | F  | 1.27 | 1.06 | 0.69 | 1.14 | 0.46 | 0.46 | 0.39 | 0.93 | 1.59 | 0.58 | 2.17 | 0.45 | 0.49 | 0.95 | 0.43 | 0.32 | 0.73 | 0.72 |
| Boston     | W  | 1.53 | 0.97 | 0.66 | 1.97 | 0.49 | 0.52 | 0.35 | 1.13 | 0.94 | 0.53 | 0.64 | 0.38 | 0.42 | 0.89 | 0.92 | 0.29 | 0.56 | 1.29 |
| Boston     | Sp | 1.60 | 1.01 | 0.47 | 3.21 | 0.43 | 0.42 | 0.53 | 0.72 | 0.87 | 0.57 | 0.69 | 0.37 | 0.37 | 0.9  | 0.89 | 0.3  | 0.52 | 1.15 |
| Boston     | Su | 2.04 | 1.11 | 0.53 | 1.93 | 0.62 | 0.68 | 1.03 | 0.92 | 1.32 | 0.74 | 0.93 | 0.57 | 0.39 | 0.79 | 1.03 | 0.45 | 0.87 | 1.04 |
| Boston     | F  | 1.78 | 1.01 | 0.79 | 2.13 | 0.52 | 0.53 | 0.39 | 0.93 | 1.08 | 0.54 | 0.72 | 0.5  | 0.41 | 0.74 | 0.82 | 0.4  | 0.86 | 2.14 |
